# Supplementary material for: Transforming Growth Factor Beta and Epithelial to Mesenchymal Transition Alter Homologous Recombination Repair Gene Expression and Sensitize BRCA Wild Type Ovarian Cancer Cells to Olaparib
Source: Preprints.org preprint supplement (doi:10.20944/preprints202304.0327.v1), 2023-04-13
Supplement: Supplementary file 1 [file supplementary]

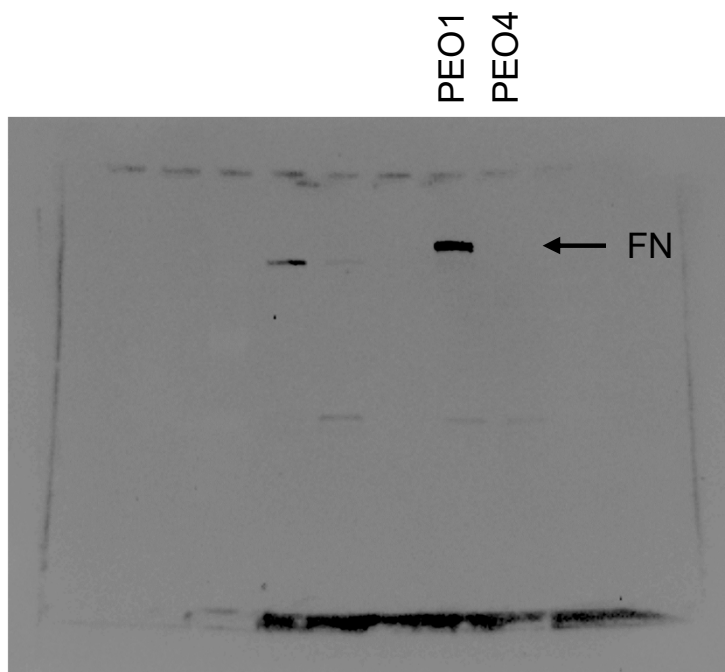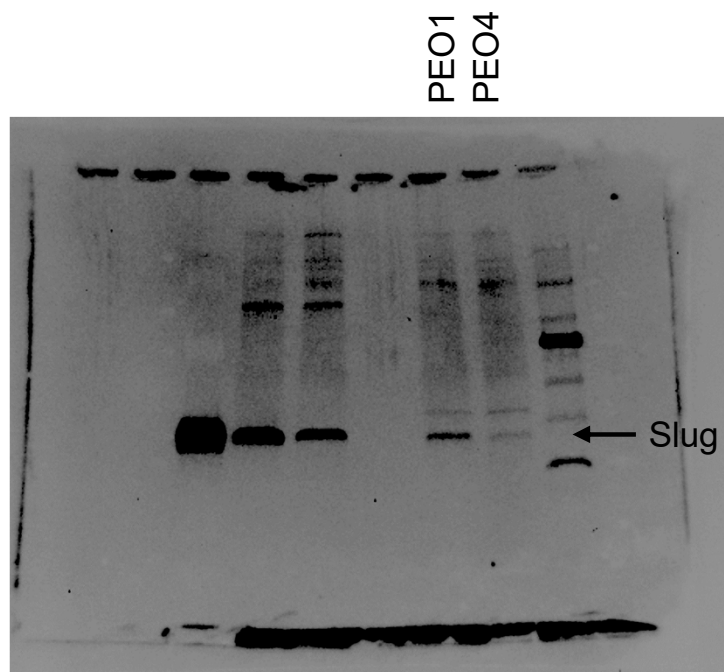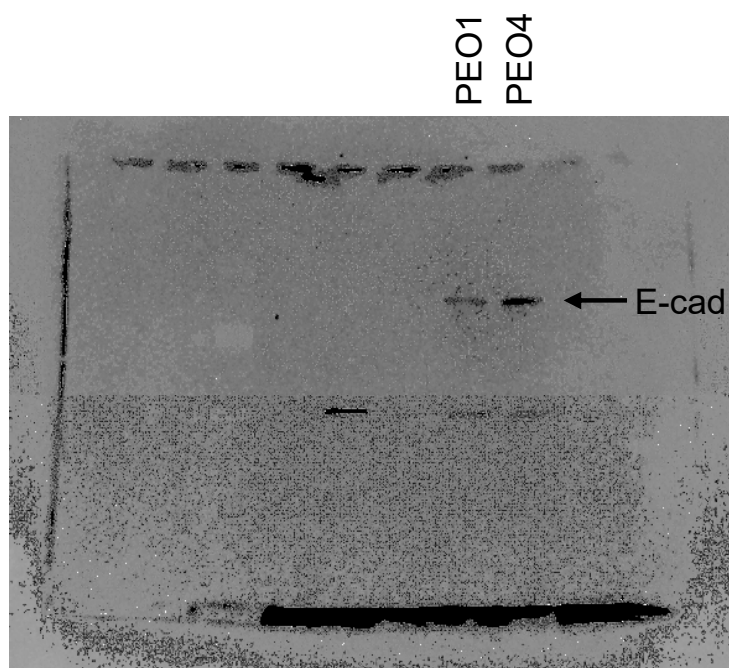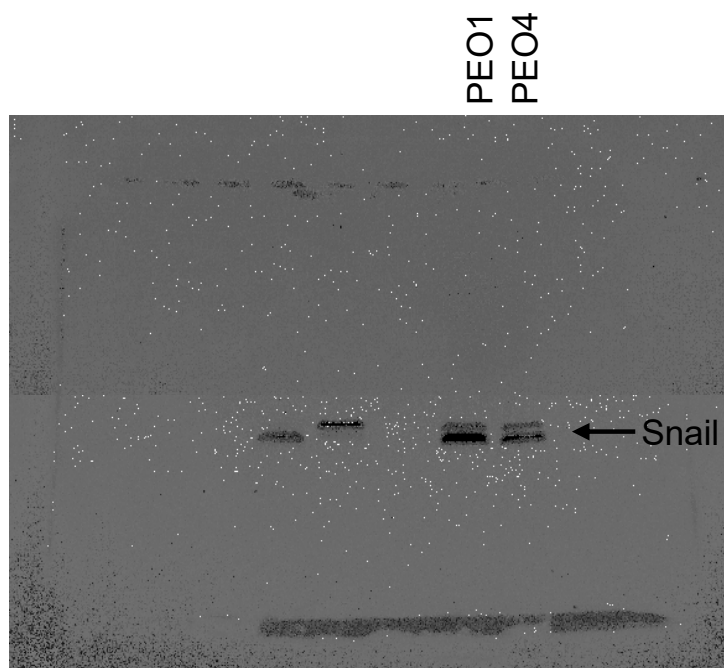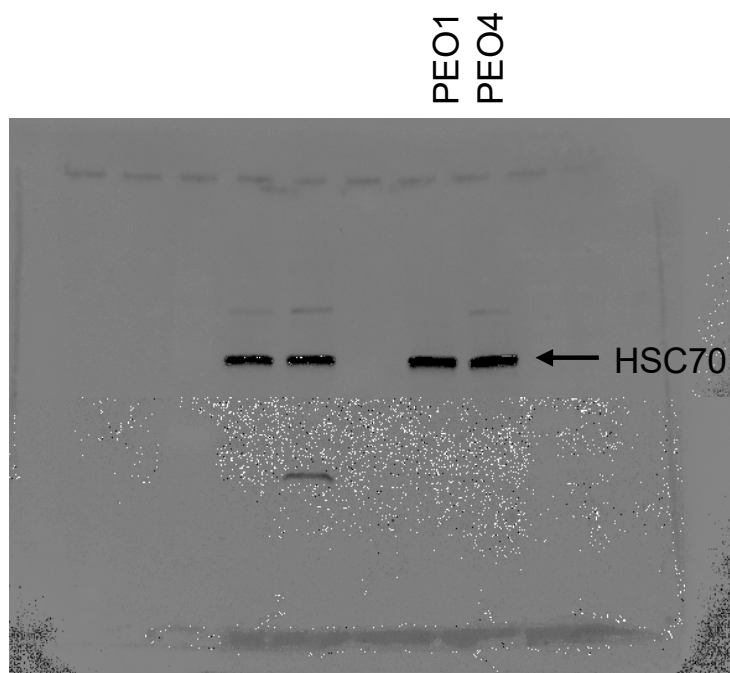

Supplementary Figure 1:  
Full western blot images  
for Figure 2C

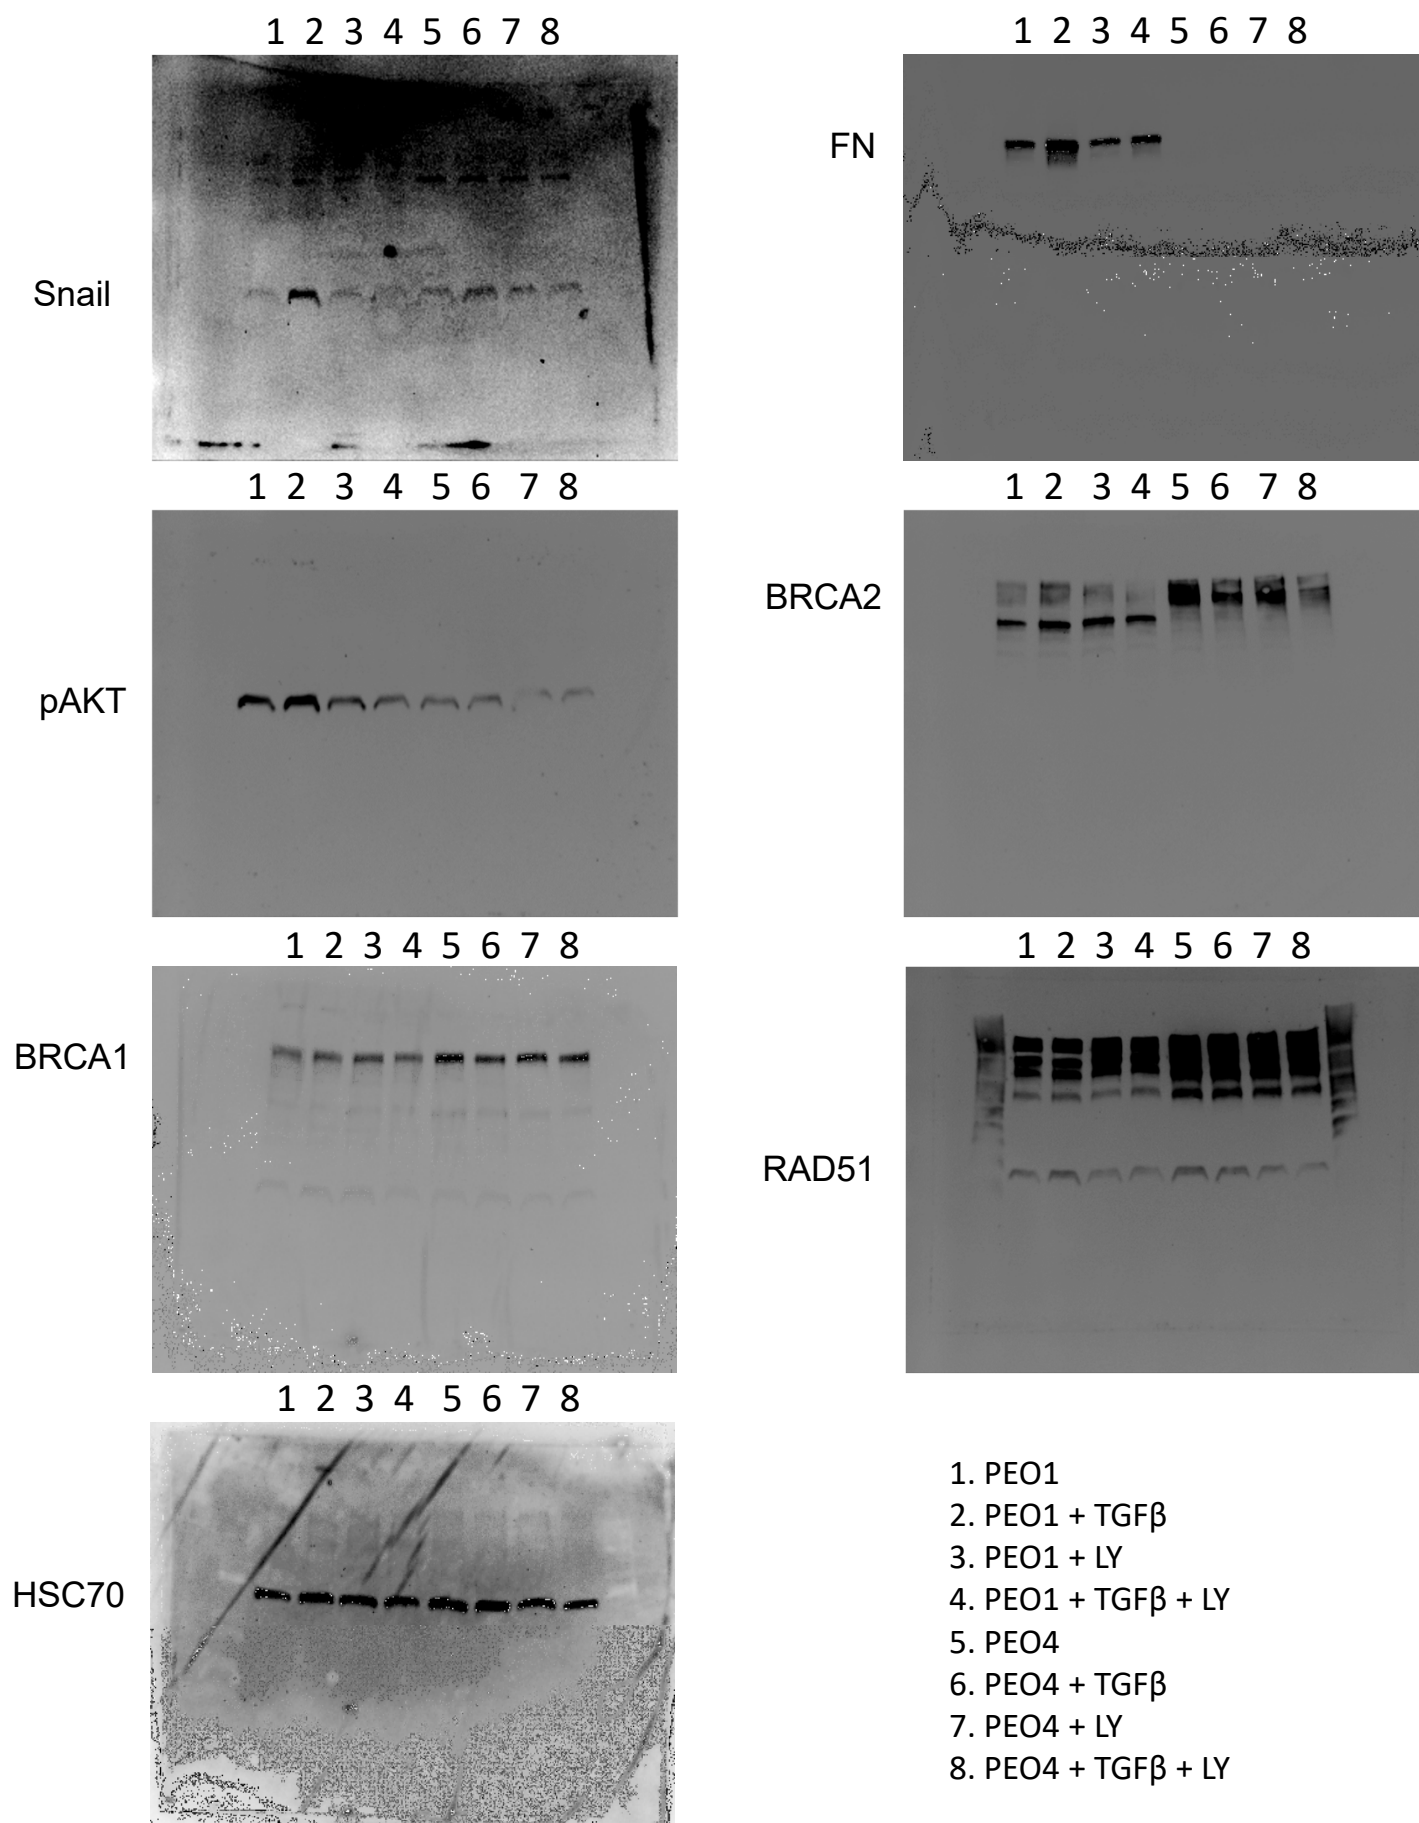

Supplementary Figure 2: Full western blot images for Figure 3A

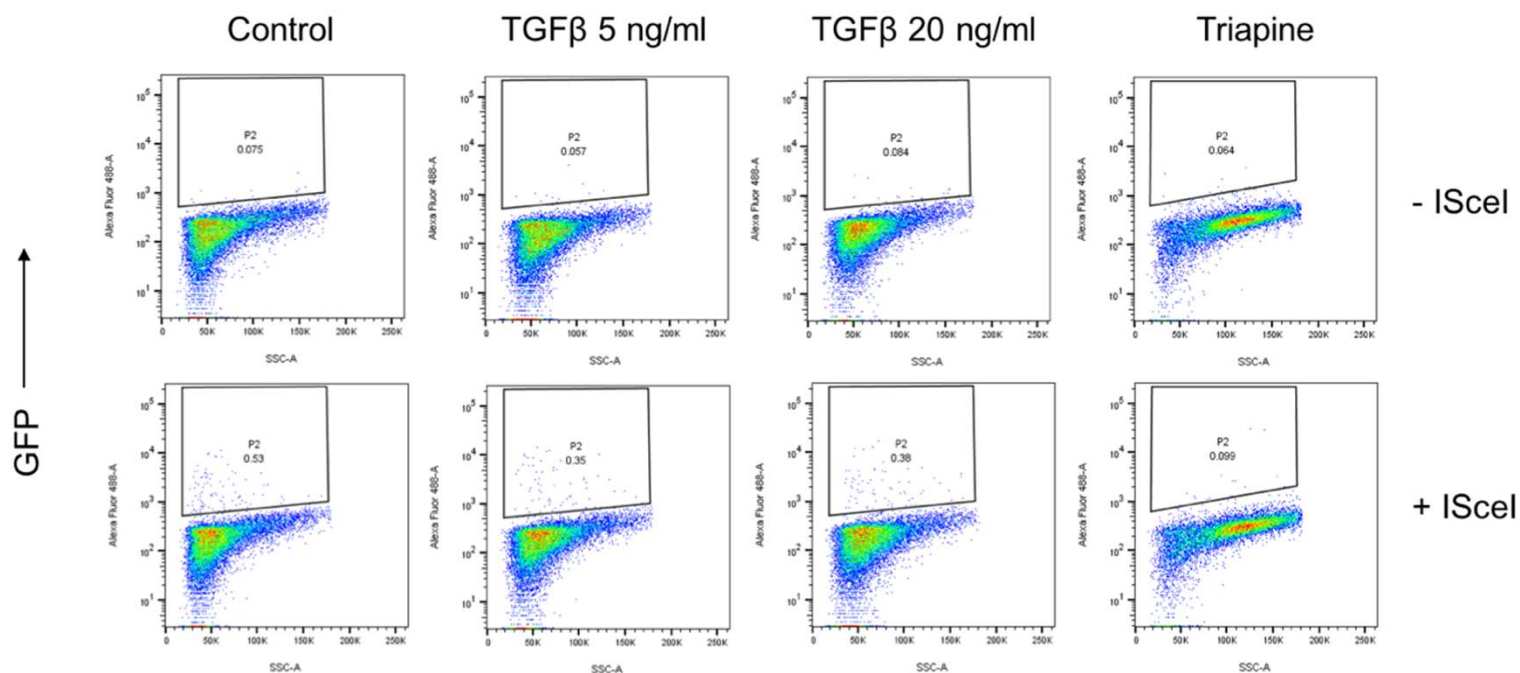

Supplementary Figure 3: Representative flow cytometry data for experiment shown in Figure 3B.

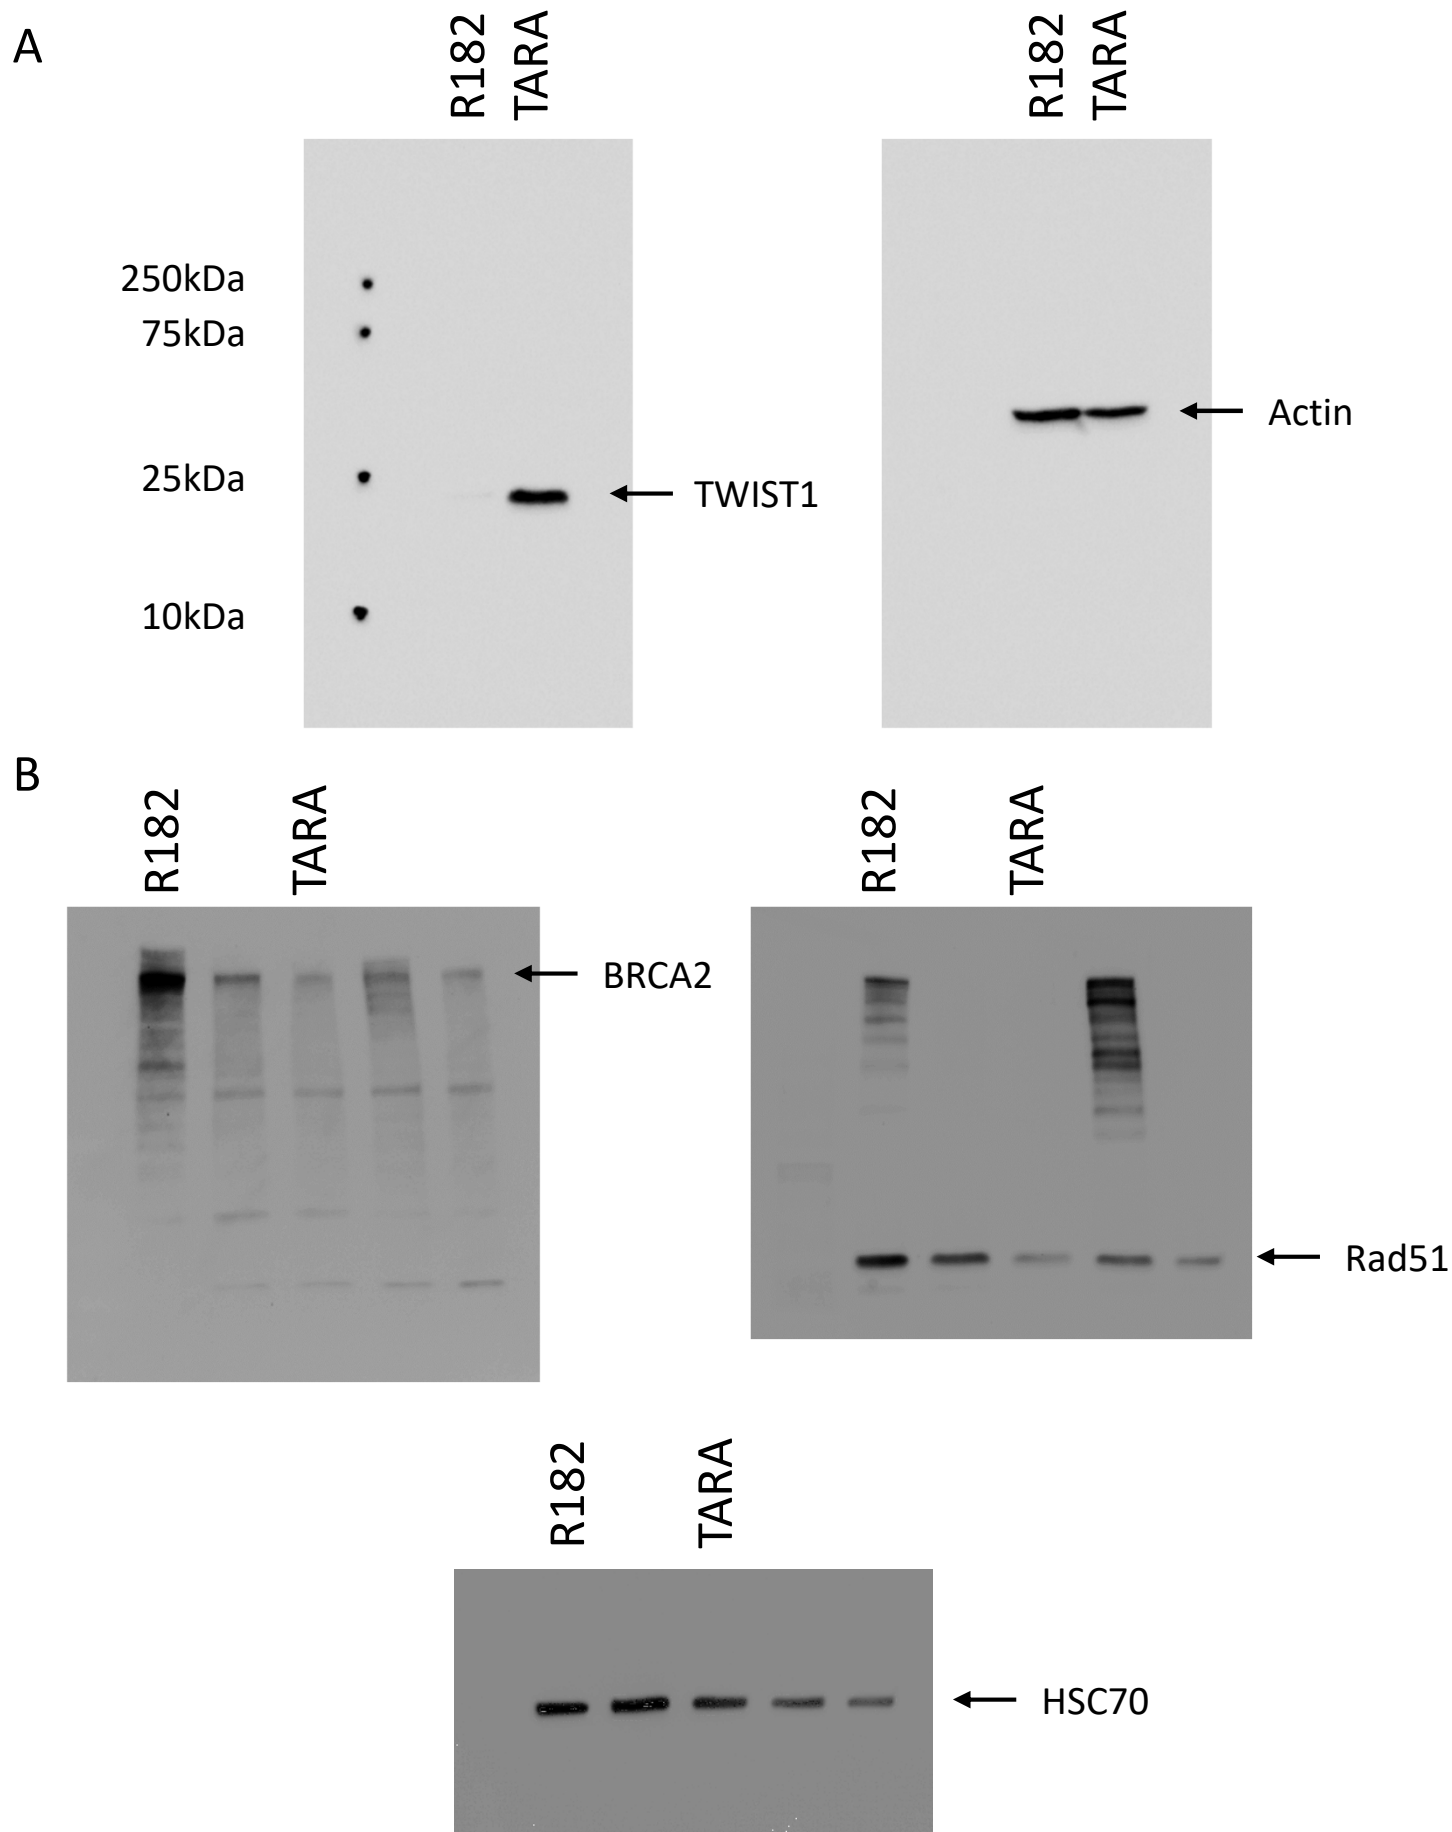

Supplementary Figure 4: Full western blot images for data shown in **A**. Figure 4C and **B**. Figure 5A.

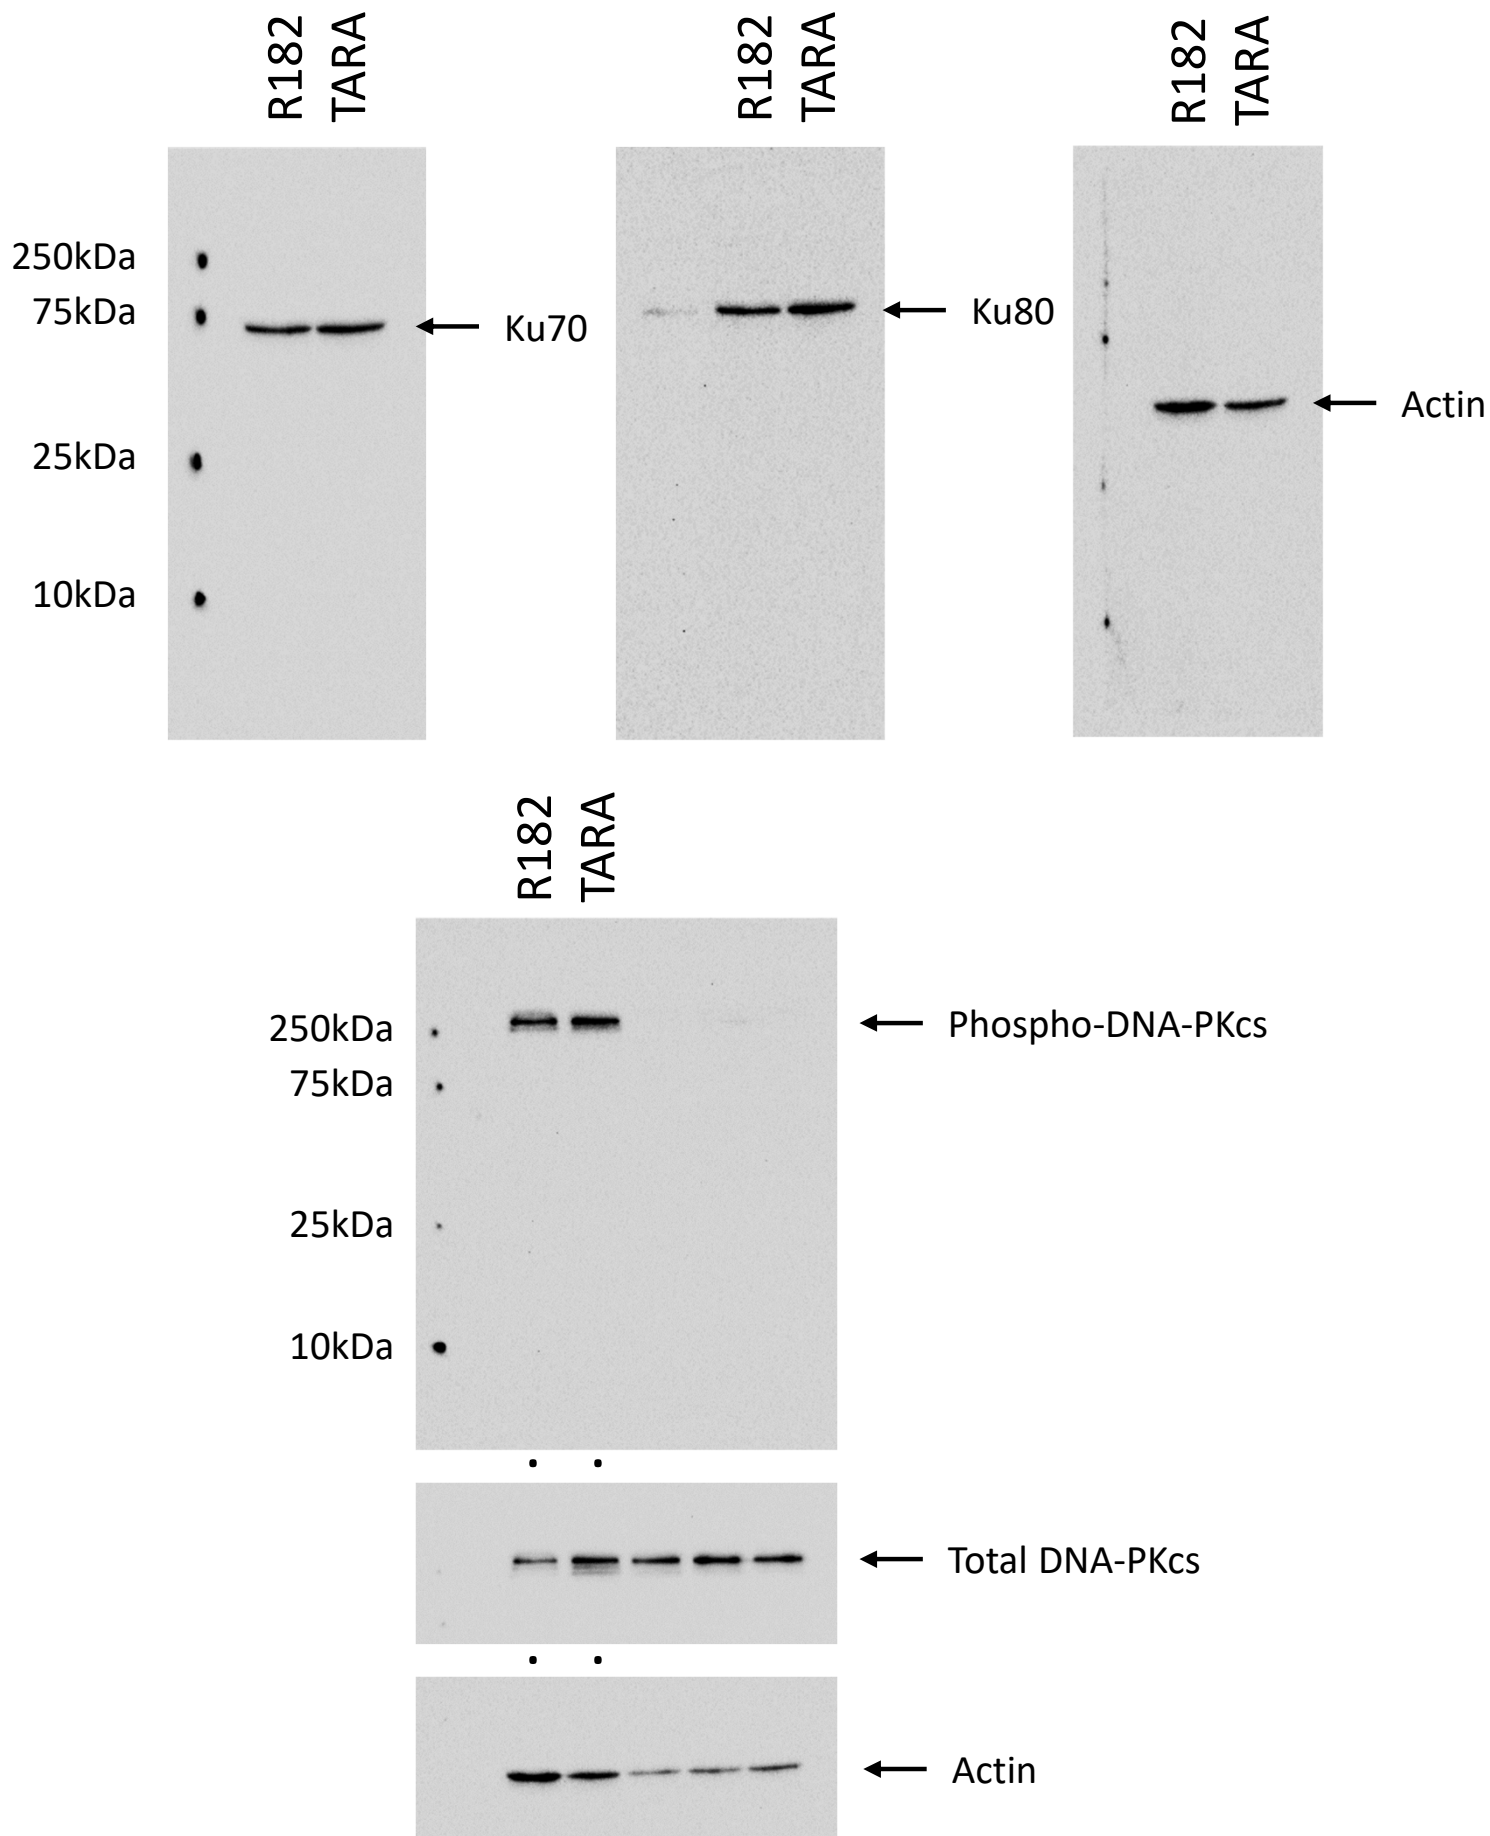

Supplementary Figure 5: Full western blot images for data shown in Figure 5C.
